# Supplementary figures and images for: Bringing ultimate depth to scanning tunnelling microscopy: deep subsurface vision of buried nano-objects in metals
Source: Royal Society of Chemistry journal article supplement (doi:10.1039/d3nh00052d), 2023-01-01

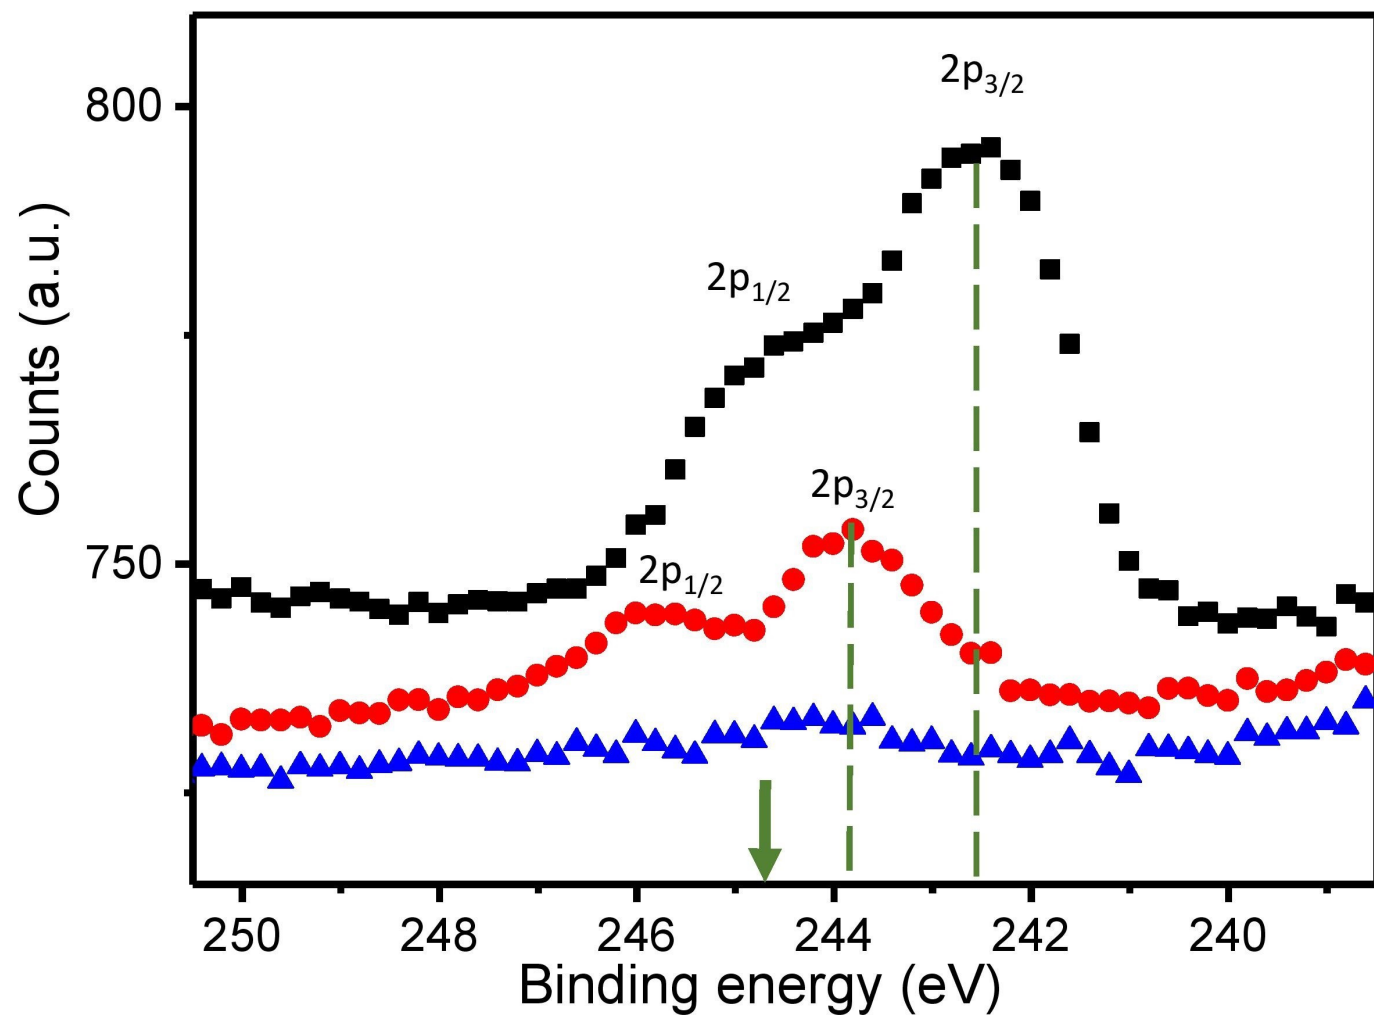

Supplement: d3nh00052d2.pdf [file d3nh00052d2.pdf]

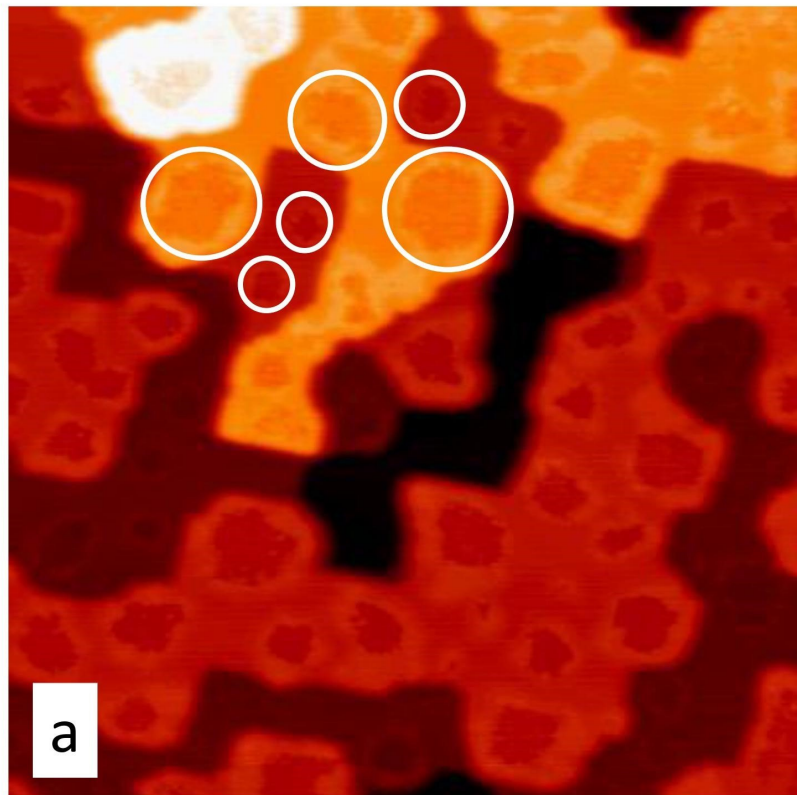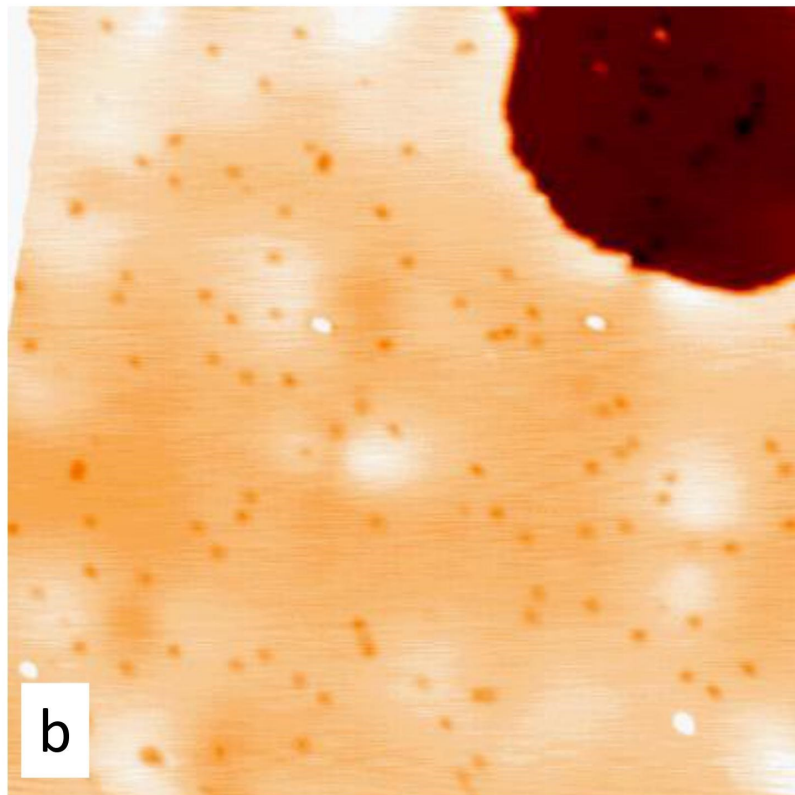

Supplement: d3nh00052d3.pdf [file d3nh00052d3.pdf]

400 × 400 nm<sup>2</sup>

(a)

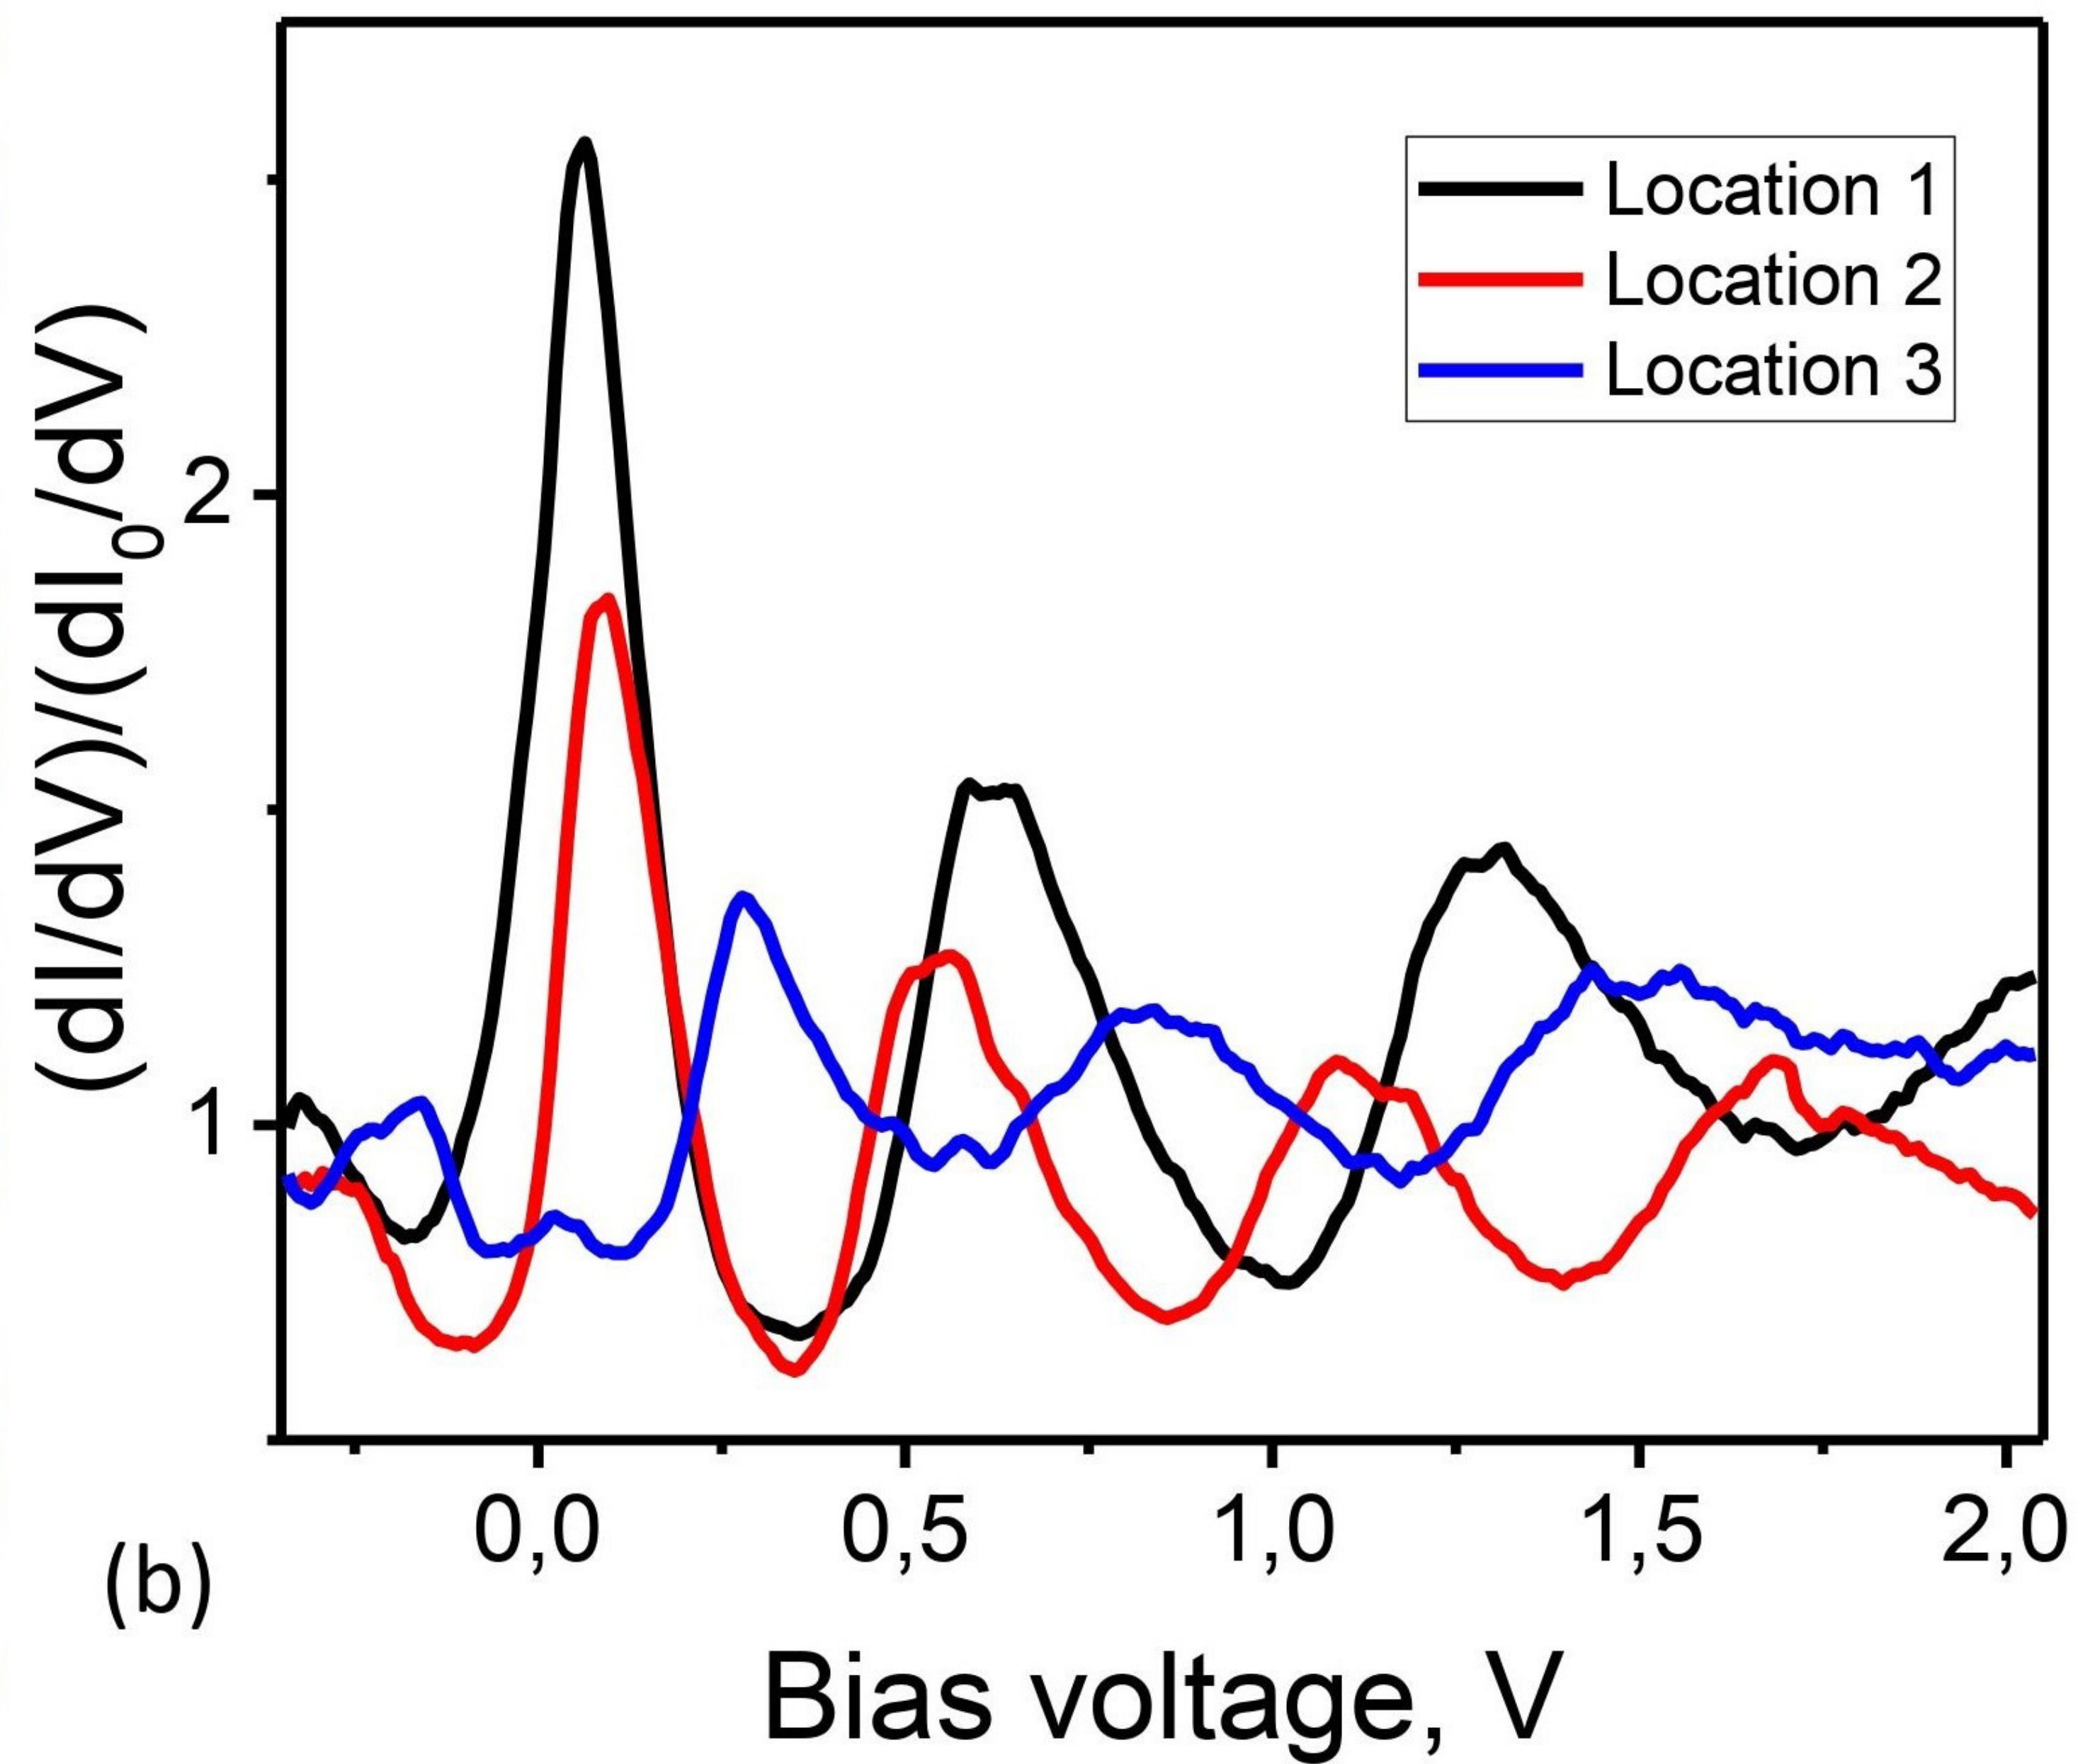

Supplement: d3nh00052d5.pdf [file d3nh00052d5.pdf]
